# Supplementary material
Source: PubMed Central journal article supplement (PMC9378483)
Supplement: NIHMS1796807-supplement-4.pdf [file NIHMS1796807-supplement-4.pdf]

**Supplementary Table S1: Pharmacokinetics of the Components of DEC-C<sup>a</sup> (12)**

| Parameter                                                    | Decitabine                                                                                                                                                                                                            | Cedazuridine                                        |
|--------------------------------------------------------------|-----------------------------------------------------------------------------------------------------------------------------------------------------------------------------------------------------------------------|-----------------------------------------------------|
| <u>General Information</u>                                   |                                                                                                                                                                                                                       |                                                     |
| Dose proportionality                                         | 20 mg to 40 mg with cedazuridine (100 mg)                                                                                                                                                                             | 40 to 100 mg with decitabine (20 mg)                |
| With the recommended dosage of DEC-C for 5 consecutive days: |                                                                                                                                                                                                                       |                                                     |
| 5-day cumulative AUC, ng·hr/mL                               | 851 (50%)                                                                                                                                                                                                             | --                                                  |
| Day 1 AUC, ng·hr/mL                                          | 103 (55%)                                                                                                                                                                                                             | 2950 (49%)                                          |
| Steady state AUC, ng·hr/mL                                   | 178 (53%)                                                                                                                                                                                                             | 3291 (45%)                                          |
| Time to steady state, days                                   | 2                                                                                                                                                                                                                     | 2                                                   |
| Accumulation ratio based on AUC                              | 1.7 (42%)                                                                                                                                                                                                             | 1.1 (63%)                                           |
| C <sub>max</sub> , ng/mL                                     | 145 (55%)                                                                                                                                                                                                             | 371 (52%)                                           |
| <u>Absorption</u>                                            |                                                                                                                                                                                                                       |                                                     |
| Bioavailability                                              | Cedazuridine increases oral decitabine exposure                                                                                                                                                                       | 20% (23%)                                           |
| <u>Elimination</u>                                           |                                                                                                                                                                                                                       |                                                     |
| Half-life at steady state, <sup>b</sup> hours                | 1.5 (27%)                                                                                                                                                                                                             | 6.7 (19%)                                           |
| <u>Metabolism</u>                                            |                                                                                                                                                                                                                       |                                                     |
| Primary Pathways                                             | Primarily by cytidine deaminase (CDA) and by physicochemical degradation                                                                                                                                              | Conversion to epimer by physicochemical degradation |
| <u>Excretion (healthy subjects)</u>                          |                                                                                                                                                                                                                       |                                                     |
| Total (% unchanged)                                          | --                                                                                                                                                                                                                    | 46% (21%) in urine and 51% (27%) in feces           |
| <u>Drug-Drug Interaction</u>                                 |                                                                                                                                                                                                                       |                                                     |
|                                                              | Cedazuridine increases oral decitabine exposure                                                                                                                                                                       | No effect of decitabine on cedazuridine             |
|                                                              | <ul style="list-style-type: none"> <li>• DEC-C may increase systemic exposure of drugs metabolized by CDA.</li> <li>• Proton pump inhibitors had no clinically meaningful effect on the exposures of DEC-C</li> </ul> |                                                     |

<sup>a</sup> Mean (% coefficient of variation)<sup>b</sup> Mean (standard deviation)

Abbreviations: AUC<sub>0-24h</sub>=area under the plasma concentration-time curve from time zero to 24 hours; C<sub>max</sub>, maximum plasma concentration; T<sub>max</sub>, time to maximum concentration; V/F, apparent volume of distribution; CL/F, apparent clearance.
